# Supplementary material for: New Design of Solar Photovoltaic and Thermal Hybrid System for Performance Improvement of Solar Photovoltaic
Source: Hindawi journal article supplement (doi:10.1155/2020/8825489), 2020-07-15
Supplement: f1 [file 8825489.f1.zip]

Archive with 2 entries (2 files):
- Data Temp Voc Ise Power.xlsx
- Solar PVT hybrid system.mp4
