# Supplementary material for: New Design of Solar Photovoltaic and Thermal Hybrid System for Performance Improvement of Solar Photovoltaic
Source: Hindawi journal article supplement (doi:10.1155/2020/8825489), 2020-07-15
Supplement: f1 [file 8825489.f1.zip › Data Temp Voc Ise Power.xlsx]

## Sheet: Sheet1
Time	Inlet	Outlet	Diff Temp	Av Diff Temp		System	Power of PVT (W)		Normal	Power of PV (W)	Improvement V	Av Im V	A	Av A	Improvement (W)	Avg Improvement (W)
					V	I		V	I
10.55	34.4	37.3	2.9	2.64514	20.1	2.51	50.451	19.1	2.45	46.795	1	0.975676	-0.06	0.0408108	3.656	2.48619
11	27.7	32.4	4.7		20.2	2.72	54.944	19.3	2.65	51.145	0.9		-0.07		3.799
11.05	29.5	33.6	4.1		20.2	2.72	54.944	19.1	2.64	50.424	1.1		-0.08		4.52
11.1	26.9	31.2	4.3		20.1	2.47	49.647	19.1	2.4	45.84	1		-0.07		3.807
11.15	28.8	30	1.2		20.3	2.72	55.216	19.4	2.7	52.38	0.9		-0.02		2.836
11.2	28.5	31.5	3		20.2	2.77	55.954	19.3	2.75	53.075	0.9		-0.02		2.879
11.25	27.3	31.2	3.9		20.2	2.78	56.156	19.1	2.76	52.716	1.1		-0.02		3.44
11.3	32.3	28	-4.3		20.6	2.8	57.68	19.3	2.74	52.882	1.3		-0.06		4.798
11.35	24.5	28.3	3.8		20.2	2.75	55.55	19.2	2.75	52.8	1		0		2.75
11.4	23.6	28.1	4.5		20.2	2.75	55.55	19.3	2.73	52.689	0.9		-0.02		2.861
11.45	25.7	29.5	3.8		20.3	2.72	55.216	19.4	2.71	52.574	0.9		-0.01		2.642
11.5	25.5	27.8	2.3		20.3	2.67	54.201	19.4	2.67	51.798	0.9		0		2.403
11.55	29.7	32.4	2.7		20.3	2.81	57.043	19.4	2.8	54.32	0.9		-0.01		2.723
12	32.3	34.4	2.1		20.4	2.53	51.612	19.2	2.6	49.92	1.2		0.07		1.692
12.05	30.3	33.9	3.6		20.1	2.64	53.064	19.1	2.64	50.424	1		0		2.64
12.1	30.6	34.2	3.6		20	2.71	54.2	19.2	2.76	52.992	0.8		0.05		1.208
12.15	30.3	34	3.7		19.9	2.65	52.735	19.1	2.69	51.379	0.8		0.04		1.356
12.2	30.1	33.5	3.4		20.1	2.72	54.672	19.2	2.75	52.8	0.9		0.03		1.872
12.25	25.7	29.6	3.9		20.2	2.75	55.55	19.3	2.83	54.619	0.9		0.08		0.931
12.3	29.1	33	3.9		20.2	2.86	57.772	19.2	2.9	55.68	1		0.04		2.092
12.35	30.1	32.7	2.6		20.1	2.56	51.456	19	2.6	49.4	1.1		0.04		2.056
12.4.	31.3	34.7	3.4		20.1	2.31	46.431	18.9	2.47	46.683	1.2		0.16		-0.252
12.45	33.3	35.3	2		20.1	2.03	40.803	20	1.67	33.4	0.1		-0.36		7.403
12.5	32.9	36.2	3.3		20.3	2.4	48.72	19.4	2.54	49.276	0.9		0.14		-0.556
12.55	32.9	33.9	1		20.2	2.48	50.096	19.4	2.55	49.47	0.8		0.07		0.626
1	29.8	33.5	3.7		20.1	2.43	48.843	19.2	2.52	48.384	0.9		0.09		0.459
1.05	31.43	33	1.57		20.2	2.37	47.874	19.3	2.5	48.25	0.9		0.13		-0.376
1.1	35.5	35	-0.5		20.1	2.2	44.22	19.1	2.32	44.312	1		0.12		-0.092
1.15	29.6	32.5	2.9		20.1	2.29	46.029	19.1	2.42	46.222	1		0.13		-0.193
1.2	32.7	34.1	1.4		20.1	2.27	45.627	19.1	2.4	45.84	1		0.13		-0.213
1.25	33.2	36	2.8		20	2.05	41	19	2.19	41.61	1		0.14		-0.61
1.3	31.9	35.9	4		20	2.15	43	18.9	2.29	43.281	1.1		0.14		-0.281
1.35	32.2	33.5	1.3		20.1	2.18	43.818	19	2.32	44.08	1.1		0.14		-0.262
1.4	34.5	36.1	1.6		20	2.11	42.2	18.8	2.25	42.3	1.2		0.14		-0.1
1.45	34.5	36.6	2.1		20	2.04	40.8	18.8	2.18	40.984	1.2		0.14		-0.184
1.5	35.4	37.5	2.1		20	2	40	18.9	2.14	40.446	1.1		0.14		-0.446
1.55	33.1	34.6	1.5		20.1	2.02	40.602	19	2.17	41.23	1.1		0.15		-0.628
2	28.3	29.9	1.6		20.1	1.98	39.798	19.2	2.14	41.088	0.9		0.16		-1.29
2.05	23.2	25.4	2.2		20.1	1.83	36.783	19.1	1.97	37.627	1		0.14		-0.844
2.1	31.2	31.1	-0.1		20	1.73	34.6	19.1	1.88	35.908	0.9		0.15		-1.308
2.15	29.8	32	2.2		20	1.73	34.6	19.1	1.9	36.29	0.9		0.17		-1.69
2.2	26.7	29.5	2.8		20.1	1.69	33.969	19.2	1.85	35.52	0.9		0.16		-1.551
2.25	27.7	29.9	2.2		20	1.61	32.2	19.2	1.76	33.792	0.8		0.15		-1.592
2.3	24.5	26.1	1.6		20	1.59	31.8	19.3	1.74	33.582	0.7		0.15		-1.782
2.35	28.2	29.2	1		20	1.44	28.8	19.1	1.59	30.369	0.9		0.15		-1.569
2.4	30.3	29.6	-0.7		19.9	1.36	27.064	19.1	1.5	28.65	0.8		0.14		-1.586
2.45	27	27.8	0.8		19.9	1.36	27.064	19.2	1.5	28.8	0.7		0.14		-1.736
2.5	30.2	31.8	1.6		19.9	1.3	25.87	19.2	1.45	27.84	0.7		0.15		-1.97
2.55	33	34.5	1.5		19.8	1.16	22.968	19.1	1.28	24.448	0.7		0.12		-1.48
3	31.6	32	0.4		19.8	1.12	22.176	19.2	1.23	23.616	0.6		0.11		-1.44
3.05	20.2	21	0.8		19.8	1.05	20.79	19.23	1.17	22.4991	0.57		0.12		-1.7091
3.1	29.2	29.8	0.6		19.7	0.97	19.109	19.4	1.06	20.564	0.3		0.09		-1.455
3.15	28.8	29.3	0.5		19.6	0.88	17.248	19.1	0.96	18.336	0.5		0.08		-1.088
3.2	31.2	32	0.8		19.5	0.77	15.015	18.9	0.83	15.687	0.6		0.06		-0.672
3.25	23	24.4	1.4		19.5	0.73	14.235	18.9	0.8	15.12	0.6		0.07		-0.885
3.3	21	22.3	1.3		19.5	0.69	13.455	18.8	0.76	14.288	0.7		0.07		-0.833
3.35	19.3	20.6	1.3		19.6	0.59	11.564	18.8	0.67	12.596	0.8		0.08		-1.032
3.4	24.2	25	0.8		19.1	0.5	9.55	18.6	0.55	10.23	0.5		0.05		-0.68
3.45	27	27.9	0.9		19.1	0.47	8.977	18.6	0.54	10.044	0.5		0.07		-1.067
3.5	23.2	23.8	0.6		19.1	0.43	8.213	18.5	0.49	9.065	0.6		0.06		-0.852
3.55	21	21.8	0.8		19	0.39	7.41	18.4	0.43	7.912	0.6		0.04		-0.502
											Average				0.502343
											Max				7.403
